# Supplementary material for: Concurrent host-pathogen gene expression in the lungs of pigs challenged with Actinobacillus pleuropneumoniae
Source: PubMed Central journal article supplement (PMC4446954; doi:10.1186/s12864-015-1557-6), 2015-05-28
Supplement: 12864_2015_1557_MOESM1_ESM.pdf [file 12864_2015_1557_MOESM1_ESM.pdf]

Supplemental Table S1 – qPCR primers employed in the study

| Gene Symbol    | Description, protein name                         | Forward sequence (5'-3') | Tm (°C) | Reverse sequence (5'-3') | Tm (°C) | Amplicon length (bp) | Reaction efficiency |
|----------------|---------------------------------------------------|--------------------------|---------|--------------------------|---------|----------------------|---------------------|
| <i>ACTB</i>    | Actin, beta                                       | CTACGTCGCCCTGGACTTC      | 61      | GCAGCTCGTAGCTCTTCTCC     | 59      | 77                   | 0.78                |
| <i>PPIA</i>    | Peptidylprolyl Isomerase A (Cyclophilin A)        | CAAGACTGAGTGGTTGGATGG    | 61      | TGTCCACAGTCAGCAATGGT     | 60      | 138                  | 0.82                |
| <i>C3</i>      | Complement Component 3                            | ATCAAATCAGGCTCCGATGA     | 61      | GGGCTTCTCTGCATTTGATG     | 61      | 76                   | 0.92                |
| <i>CFB</i>     | Complement factor B                               | TGATGGAGCGGGTACTG        | 61      | TCGGCTGCAGTAGTAGGTGA     | 60      | 103                  | 1.07                |
| <i>CFD</i>     | Complement factor D                               | CCTCGGAGCAGCTGTATGT      | 59      | ATGCCATGTAGGGTCTCTCG     | 60      | 89                   | 0.90                |
| <i>MASP2</i>   | Mannan-binding lectin serine peptidase 2          | GGCAAGGACAGCTGTAAAGG     | 60      | TTCCTCCCACAAACCACTTC     | 60      | 82                   | 0.96                |
| <i>TLR2</i>    | Toll-like receptor 2                              | GTTTTACGGAAATTGTGAAACTG  | 58      | TCCACATTACCGAGGGATTT     | 59      | 136                  | 0.54                |
| <i>TLR4</i>    | Toll-like receptor 4                              | TTCCACAAAAGTCGGAAGG      | 60      | CAACTTCTGCAGGACGATGA     | 60      | 145                  | 1.05                |
| <i>CD14</i>    | CD14 molecule                                     | GGGTTCTCTGCTCAGATTCTG    | 60      | CCCACGACACATTACGGAGT     | 61      | 165                  | 0.80                |
| <i>MYD88</i>   | Myeloid differentiation primary response 88       | CCAGACTAAGTTTGCCTCAGC    | 59      | AGGATGCTGGGGAACCTTTT     | 60      | 99                   | 0.98                |
| <i>LBP</i>     | Lipopolysaccharide binding protein                | CCCAAGGTCAATGATAAGTTGG   | 61      | ATCTGGAGAACAGGGTCGTG     | 60      | 83                   | 0.92                |
| <i>CD163</i>   | CD163 molecule                                    | CACATGTGCCAACAAAATAAGAC  | 59      | CACCACCTGAGCATCTTCAA     | 60      | 130                  | 0.86                |
| <i>MD2</i>     | Lymphocyte antigen 96                             | CAGTAAAGGTTGAGCCCTGTG    | 60      | TTTGCGCATTGGTAAAGTCA     | 60      | 140                  | 0.94                |
| <i>IRF3</i>    | Interferon regulatory factor 3                    | GCTACACCCTCTGTTTCTGC     | 60      | GAGACACATGGGGACAACCT     | 60      | 95                   | 0.99                |
| <i>IL1B</i>    | Interleukin 1, beta                               | CCAAAGAGGGACATGGAGAA     | 60      | GGGCTTTTGTCTGCTTGAG      | 60      | 123                  | 1.06                |
| <i>IL1RN</i>   | Interleukin 1 receptor antagonist                 | GTTGGACGCAGTTAACATCACA   | 61      | GCTGACTCAAAGCTGGTGGT     | 60      | 105                  | 1.02                |
| <i>IL6</i>     | Interleukin 6                                     | TGGGTTCAATCAGGAGACCT     | 60      | CAGCCTCGACATTTCCCTTA     | 60      | 116                  | 0.88                |
| <i>IL8</i>     | Interleukin 8                                     | GAAGAGAACTGAGAAGCAACAACA | 60      | TTGTGTTGGCATCTTTACTGAGA  | 60      | 99                   | 0.85                |
| <i>IL17A</i>   | Interleukin 17A                                   | TACTCCAAACGCTCCACCTC     | 60      | AGCATTGATACAGCCCGAGT     | 60      | 111                  | 0.97                |
| <i>IL18</i>    | Interleukin 18 (interferon-gamma-inducing factor) | CTGCTGAACCGGAAGACAAT     | 60      | TCCGATTCCAGGTCTTCATC     | 60      | 110                  | 0.91                |
| <i>TNF</i>     | Tumor necrosis factor                             | CACGTTGTAGCCAATGTCAAAG   | 61      | GAGGTACAGCCCATCTGTCCG    | 61      | 129                  | 0.91                |
| <i>TNFAIP3</i> | Tumor necrosis factor, alpha-induced protein 3    | CCCAGCTTCTCTCATGGAC      | 60      | TTGGTCTTCTGCCGTCTCT      | 60      | 113                  | 0.92                |
| <i>SAA</i>     | Serum amyloid A                                   | CAGAGATGGGCATCATTCTT     | 60      | TGGCATCGCTGATCACTTTA     | 60      | 184                  | 0.96                |
| <i>HP</i>      | Haptoglobin                                       | ACAGATGCCACAGATGACAGC    | 61      | CGTGCGCAGTTTGTAGTAGG     | 60      | 105                  | 0.95                |
| <i>TF</i>      | Transferrin                                       | CTCAACCTCAAACCTCCTGGAA   | 61      | CCGTCTCCATCAGGTGGTA      | 59      | 82                   | 1.01                |
| <i>LTF</i>     | Lactotransferrin                                  | GGAAAAGACTGCCAGACAA      | 60      | ACACTCCGTGTTGTGCTTGA     | 60      | 78                   | 1.00                |
| <i>IFNg</i>    | Interferon, gamma                                 | CCATTCAAAGGAGCATGGAT     | 60      | TTCAGTTTCCAGAGCTACCA     | 60      | 76                   | 0.89                |
| <i>GZMB</i>    | Granzyme B                                        | CCAGGACCAGGATAATCGAA     | 60      | GGGTGACGTTGATTGAGCTT     | 60      | 101                  | 1.04                |
| <i>CSF2</i>    | Colony stimulating factor 2                       | CCGAGGAAACTTCTGTGAA      | 60      | GCAGTCAAAGGGGATGGTAA     | 60      | 92                   | 1.08                |
| <i>SFTPA</i>   | Surfactant protein A                              | CATGGGTGTCCTCAGTTTCC     | 60      | CATCAAAGCGACTGACTGC      | 60      | 86                   | 0.91                |
| <i>SFTPD</i>   | Surfactant protein D                              | AGCGGAGCAGAGAACTGTGT     | 60      | CTCAGAACTCGCAGATCACG     | 60      | 94                   | 0.91                |
| <i>kdsB</i>    | 3-deoxy-manno-octulosonate cytidyltransferase     | GGAACGTTTAGCGGAAGTGA     | 60      | CAACGGCTCATCACCTTGTA     | 60      | 82                   | 1.06                |
| <i>wzxE</i>    | Lipopolysaccharide biosynthesis protein           | GCGCGATTTACTGATGGAAT     | 60      | AAAACCGCCGTAATCAGTTG     | 60      | 102                  | 0.96                |
| <i>comEA</i>   | DNA uptake protein                                | CCTAATAATCCGCCGTTTC      | 61      | CGGCAGTTTGTTCGTTGT       | 60      | 70                   | 0.99                |

|               |                                                     |                      |    |                       |    |     |      |
|---------------|-----------------------------------------------------|----------------------|----|-----------------------|----|-----|------|
| <i>hgbA</i>   | Hemoglobin-binding protein A                        | ATAAGGTCTTGCCGTTGCAC | 59 | AGACGAAAGAAGCCGCATTA  | 59 | 155 | 0.76 |
| <i>ompP4</i>  | Lipoprotein E                                       | TGCGCAAGTGCTTGATATTC | 58 | GCTCATCACGATACGAGCAA  | 58 | 104 | 0.91 |
| <i>apxIIA</i> | Hemolysin A (RTX-II toxin determinant A)            | GAATCATTTCCATCGCCTGT | 58 | TCGATGGAGGAAACGGTAAC  | 58 | 112 | 0.92 |
| <i>mltC</i>   | Membrane-bound lytic murein transglycosylase C      | AAGATGGCAAACGTTACGG  | 60 | TTCGCATAACTGACCGCATA  | 60 | 95  | 0.95 |
| <i>dnaK</i>   | Chaperone protein DnaK                              | ATCCTCGTTGGTGGTCAAAC | 60 | CTTCATCCGGATTACGTCT   | 60 | 97  | 0.90 |
| <i>afuB</i>   | Ferric transport system permease protein fbpB       | GTTATTACGTCCGGCATTGG | 60 | ACGTCAAAGCTACCGCTAA   | 60 | 99  | 0.99 |
| <i>mgsA</i>   | Methylglyoxal synthase                              | CCGGATGTCAAAGCGTTAAT | 60 | GAAATTGGCACTGGTTTCGT  | 60 | 78  | 0.93 |
| <i>wecC</i>   | UDP-N-acetyl-D-mannosamine dehydrogenase            | CGCACGAGAAGTAAACGACA | 60 | AAACAATTTGCGCGATTAC   | 60 | 90  | 0.97 |
| <i>csgG</i>   | Putative lipoprotein                                | GACGAGGCAAAGAGCAAGTC | 60 | CCTTGCACCGAATAAACCAC  | 60 | 88  | 0.93 |
| <i>tolA</i>   | Cell envelope integrity inner membrane protein TolA | GCAAGCGGAAGAAGCTACAC | 60 | TTTTGCCGCAGCTTCTAAAT  | 60 | 91  | 0.89 |
| <i>pala</i>   | Outer membrane protein PalA                         | CGTGCAGACGCAGTTAAAAA | 60 | CCGGTTTTTCTTACCCTAA   | 60 | 82  | 0.84 |
| <i>ompA</i>   | Outer membrane protein P5                           | TTGGGTGCAGGTGTTGAATA | 60 | TCTTGTGTGCCTGAACGAAC  | 60 | 116 | 0.76 |
| <i>csrA</i>   | Carbon storage regulator homolog                    | CATCATCCGCTAATGCTTTG | 58 | ATTACCGTTCTCAGCGTTTCG | 59 | 115 | 0.74 |
| <i>manB</i>   | Phosphomannomutase                                  | AGAAGAAGCAACGGTCGAAA | 59 | ACCCGATTCTGCATGAAAC   | 58 | 105 | 0.88 |
