# Supplementary material for: Concurrent host-pathogen gene expression in the lungs of pigs challenged with Actinobacillus pleuropneumoniae
Source: PubMed Central journal article supplement (PMC4446954; doi:10.1186/s12864-015-1557-6), 2015-05-28
Supplement: 12864_2015_1557_MOESM3_ESM.pdf [file 12864_2015_1557_MOESM3_ESM.pdf]

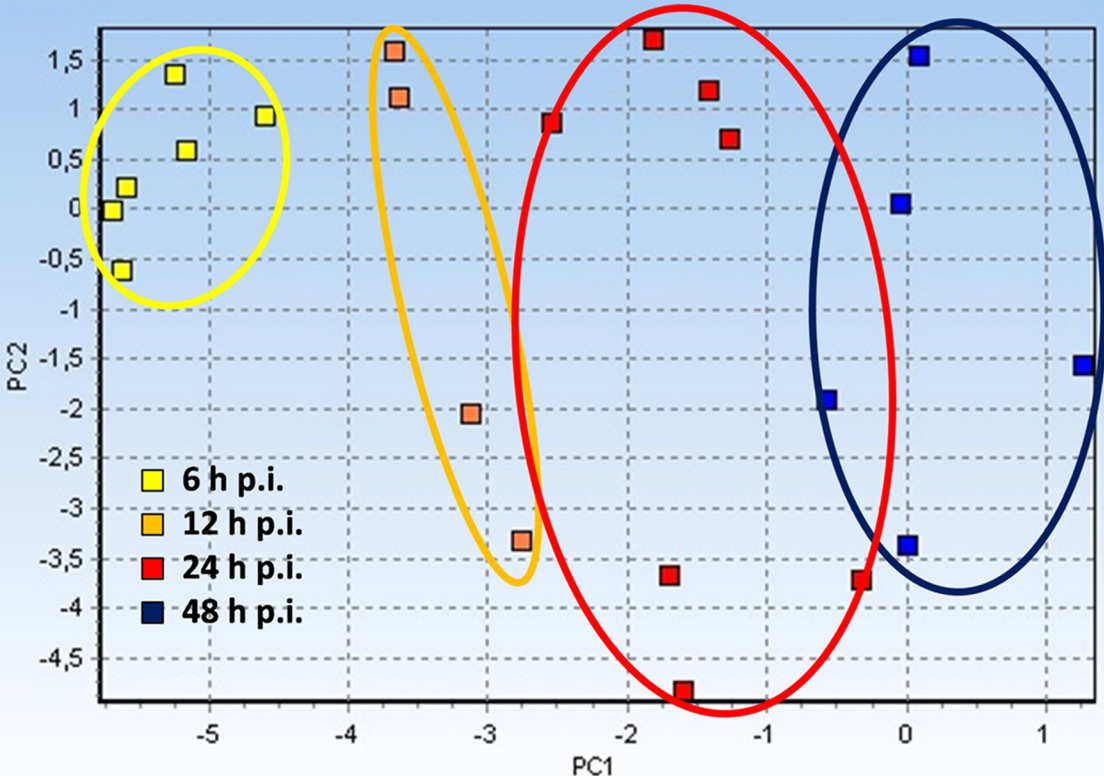

Supplementary Figure S1. Principal component analysis of bacterial gene expression profiles. Each point represents an individual sample.
